# Supplementary material
Source: MDPI journal article supplement (https://www.mdpi.com/2072-4292/12/13/2171)

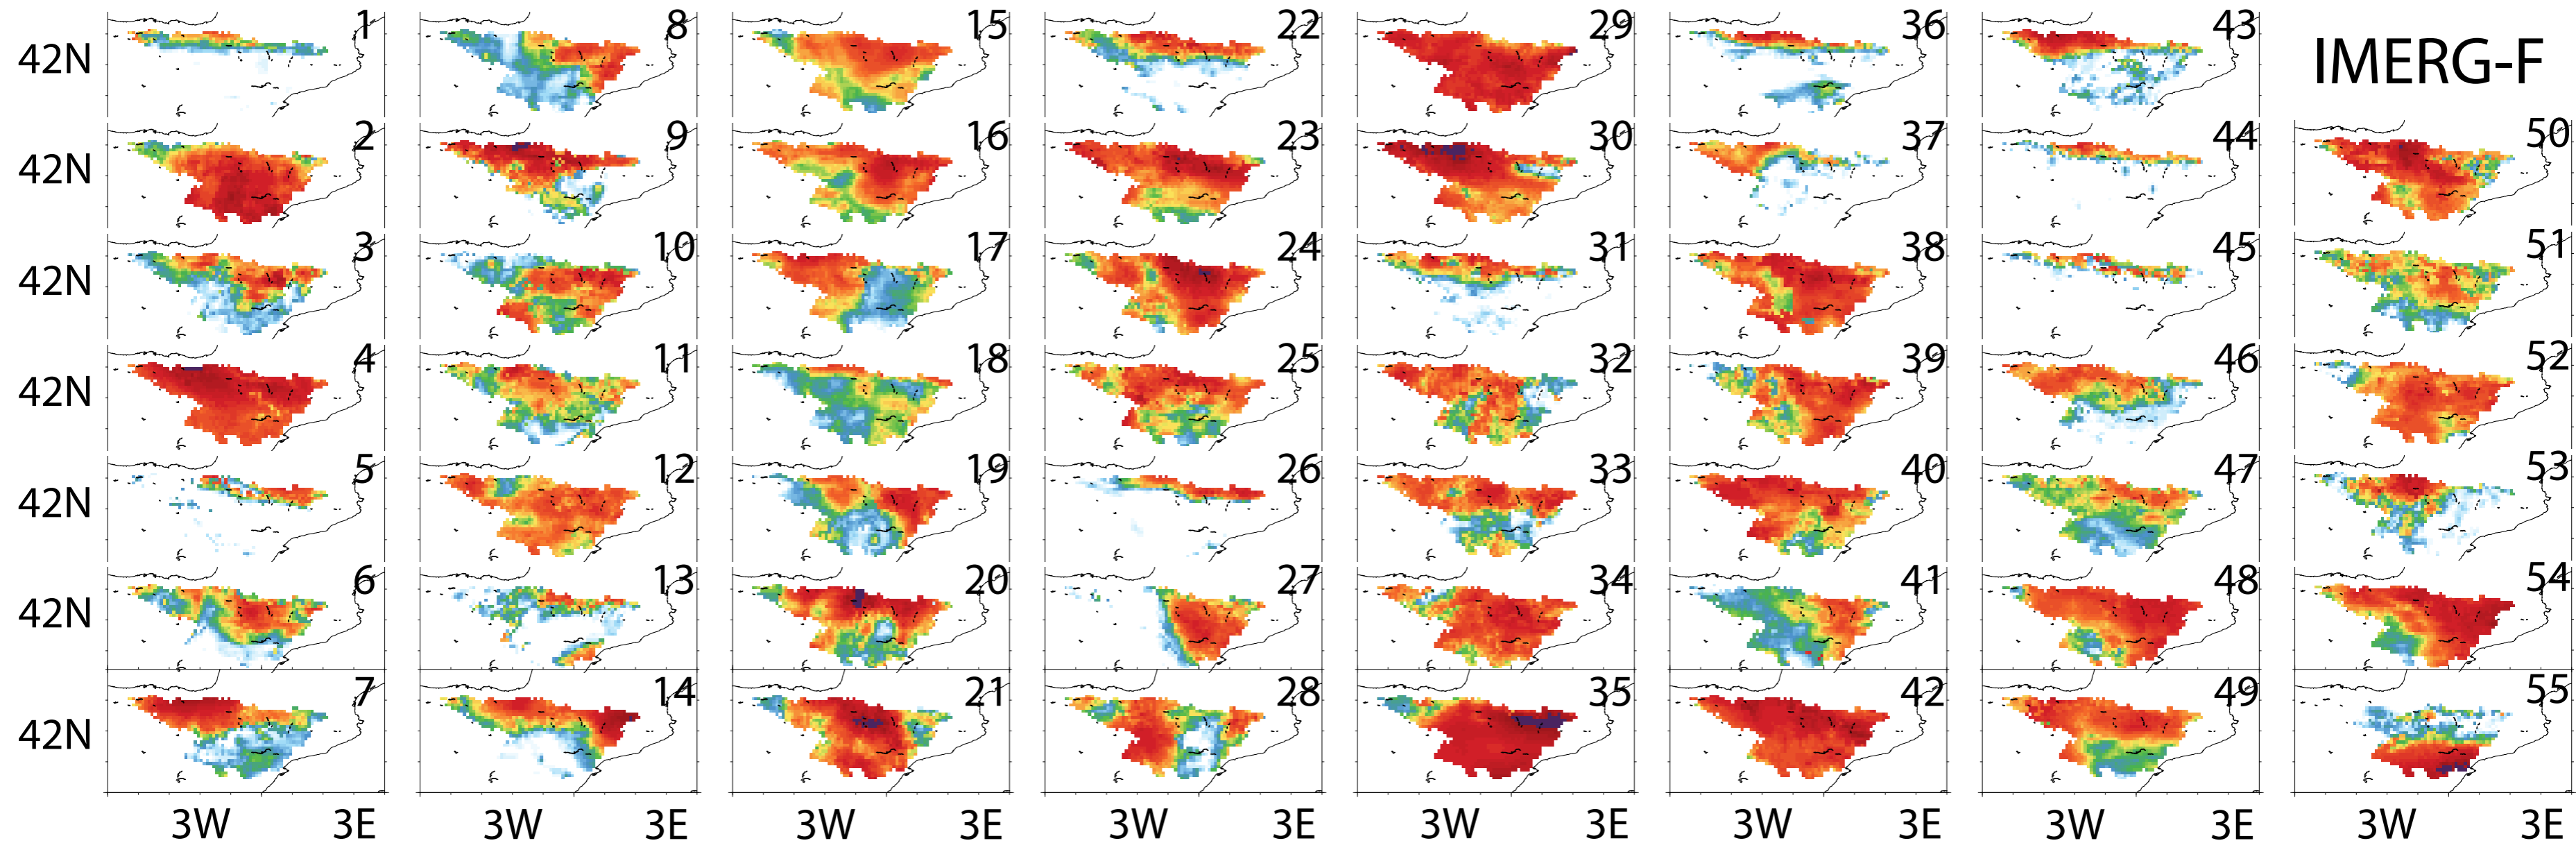

Precipitation (mm/day)

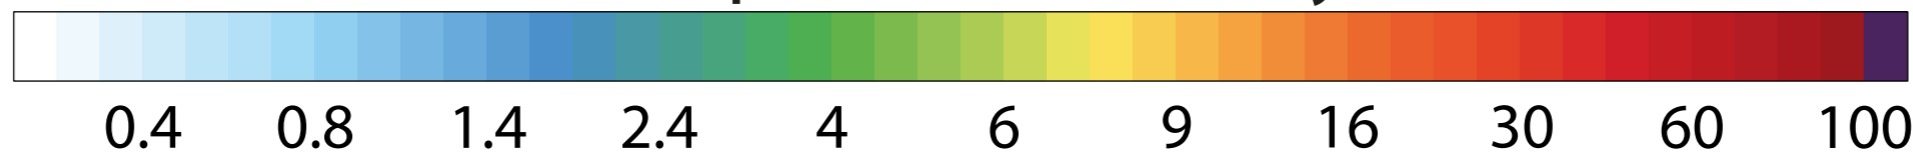

Supplement: s1 [file s1]

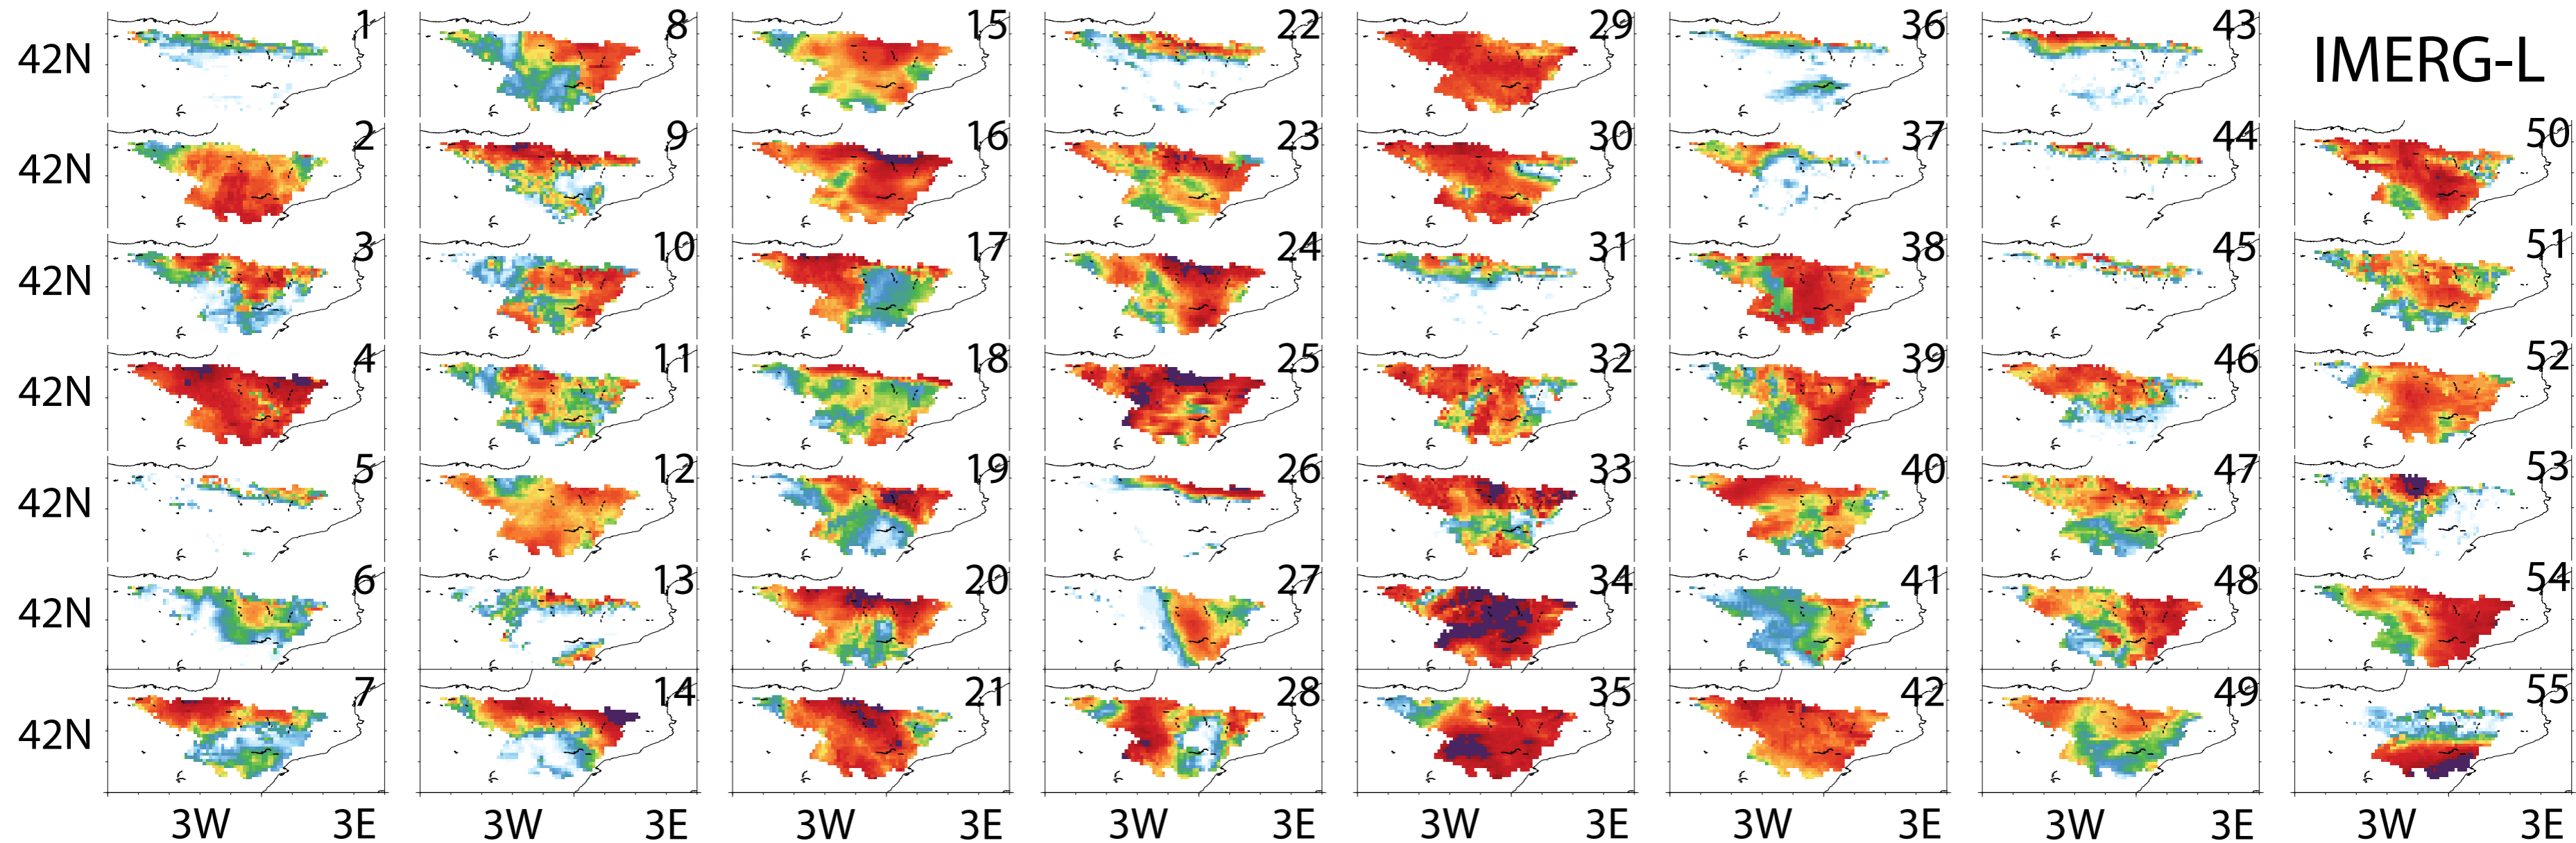

Precipitation (mm/day)

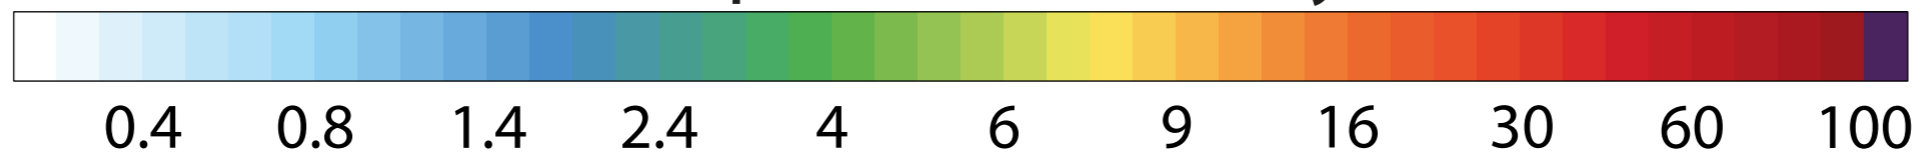

Supplement: s1 [file s1]

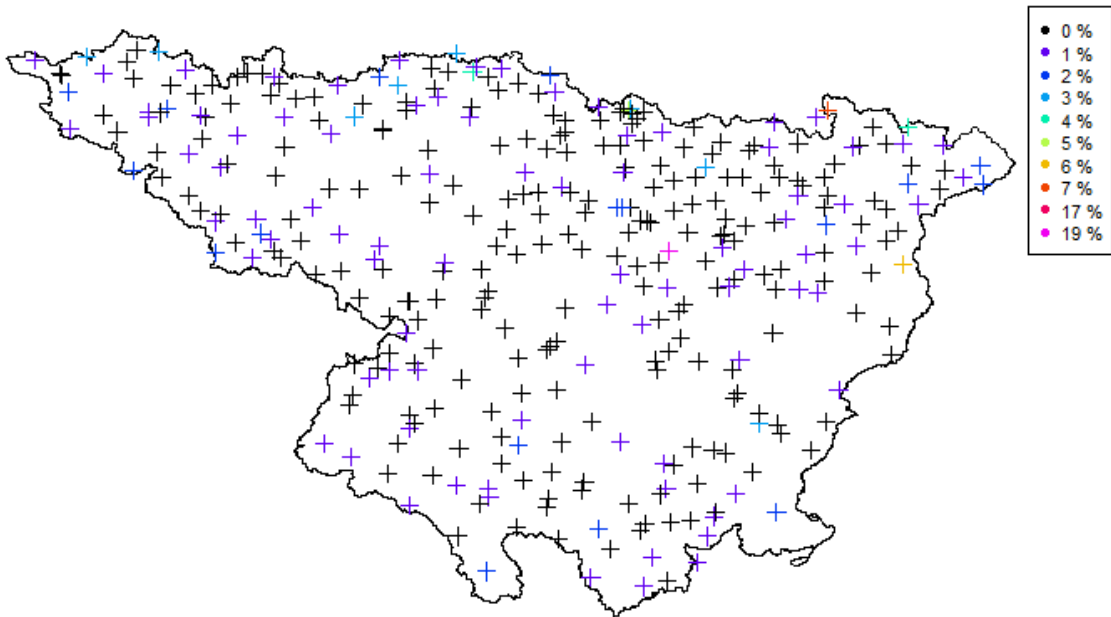

Supplement: s1 [file s1]

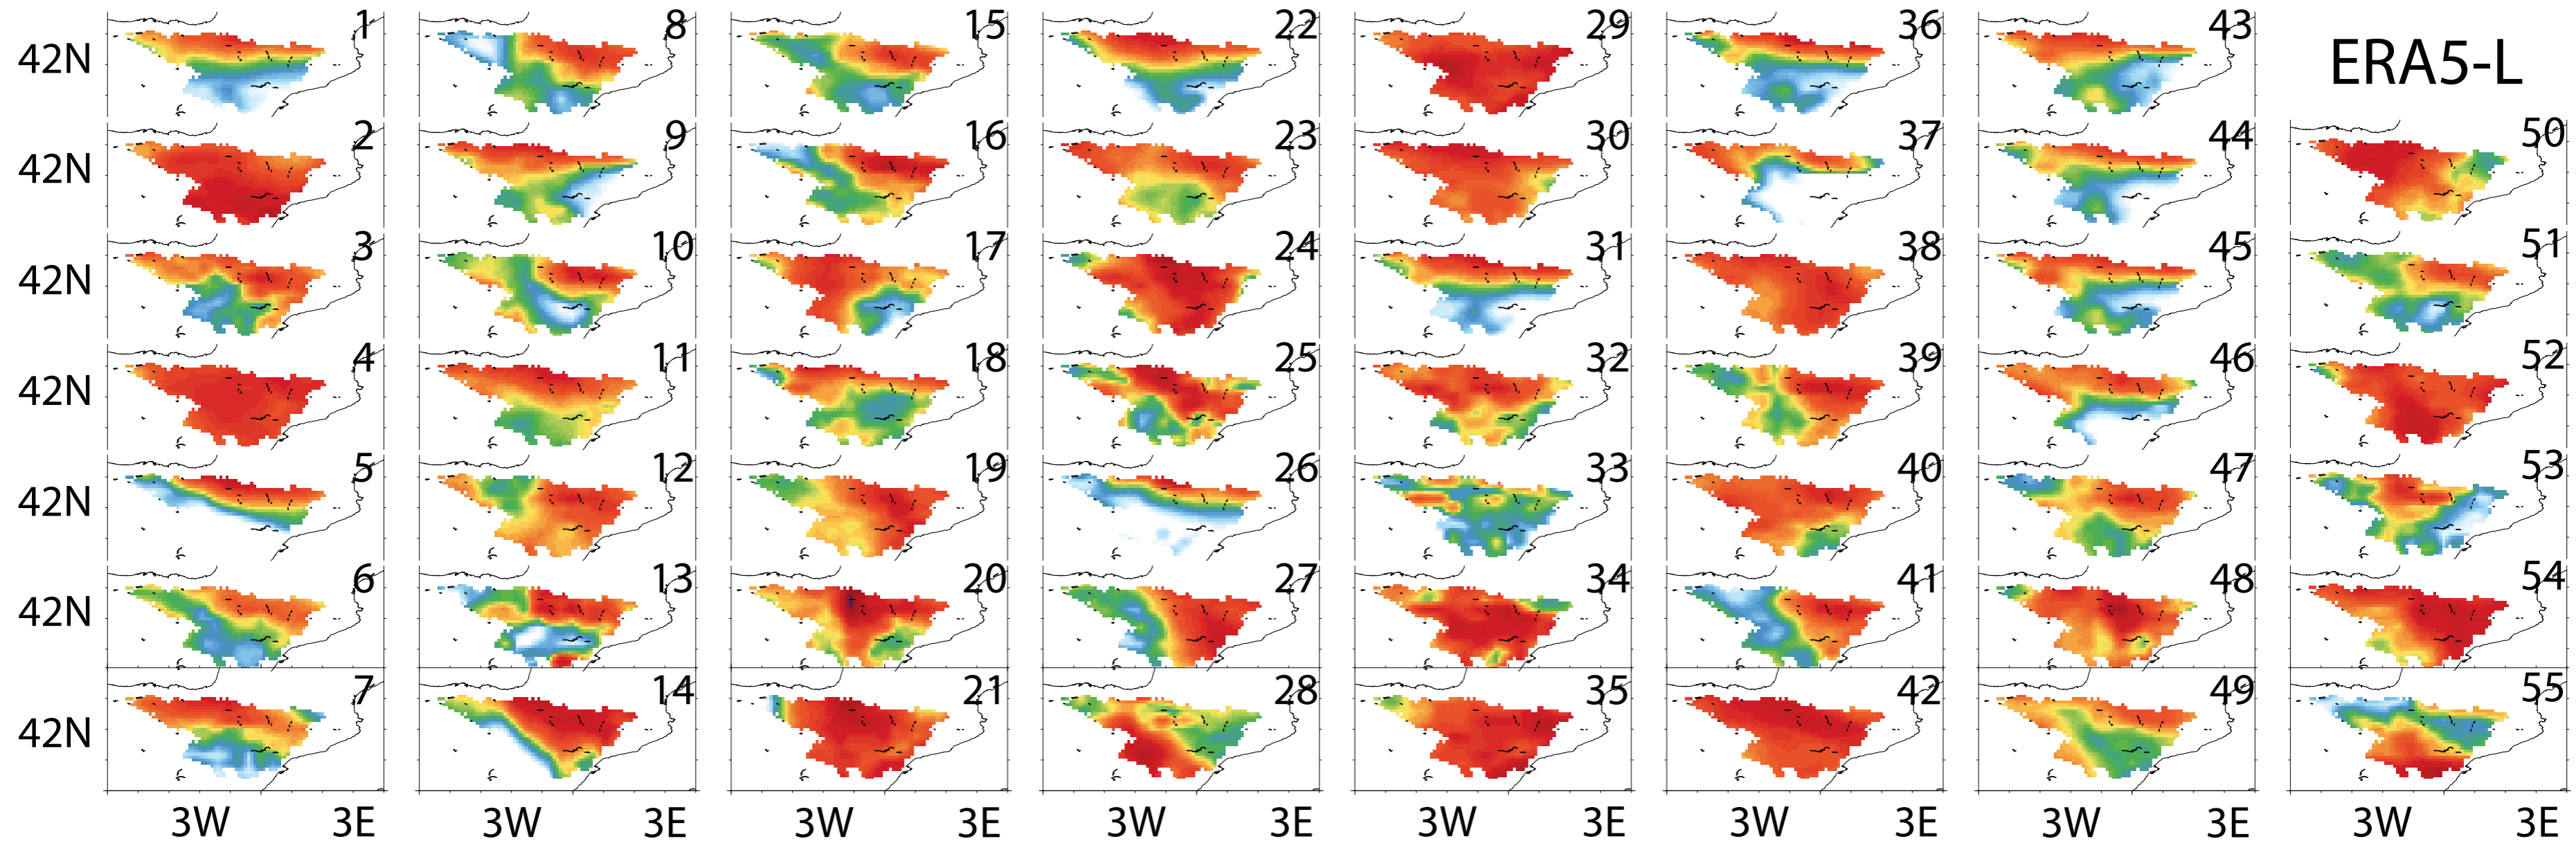

ERA5-L

50

51

52

53

54

55

3W 3E

Precipitation (mm/day)

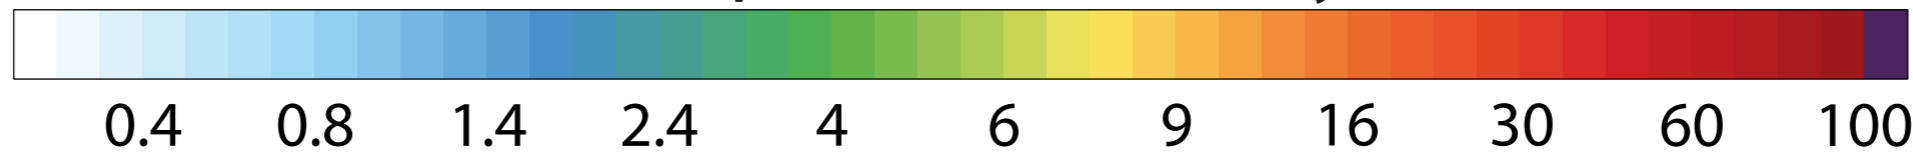

Supplement: s1 [file s1]

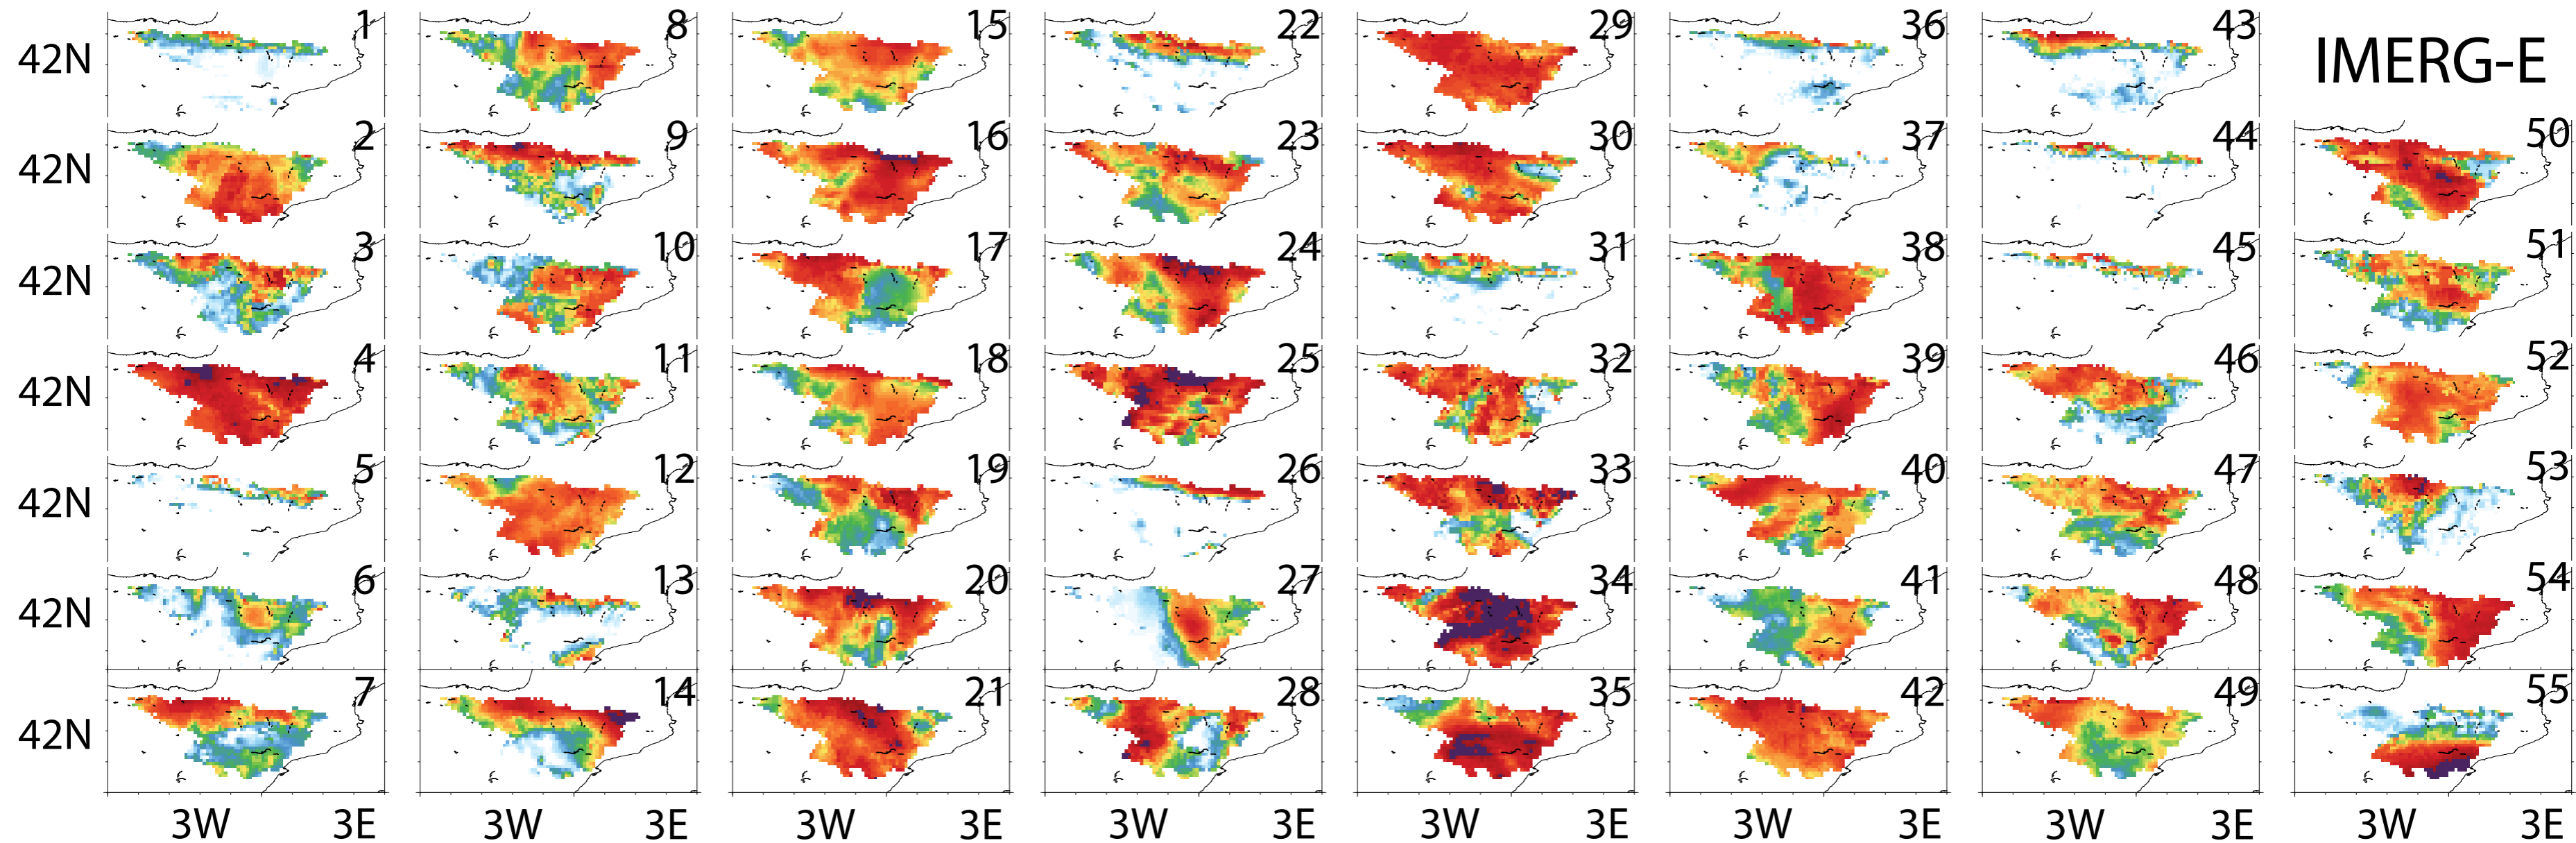

Precipitation (mm/day)

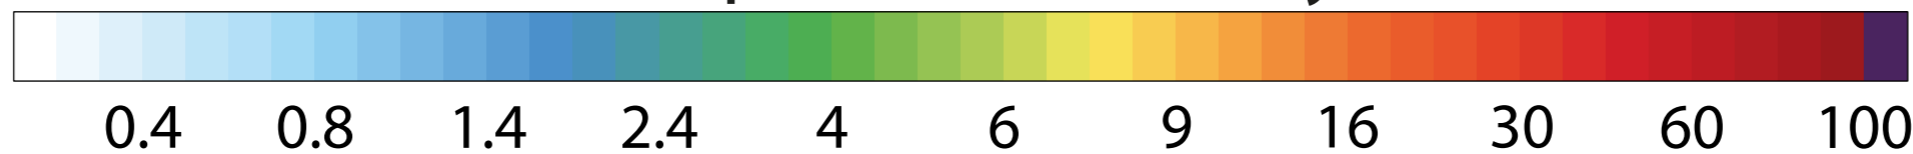

Supplement: s1 [file s1]

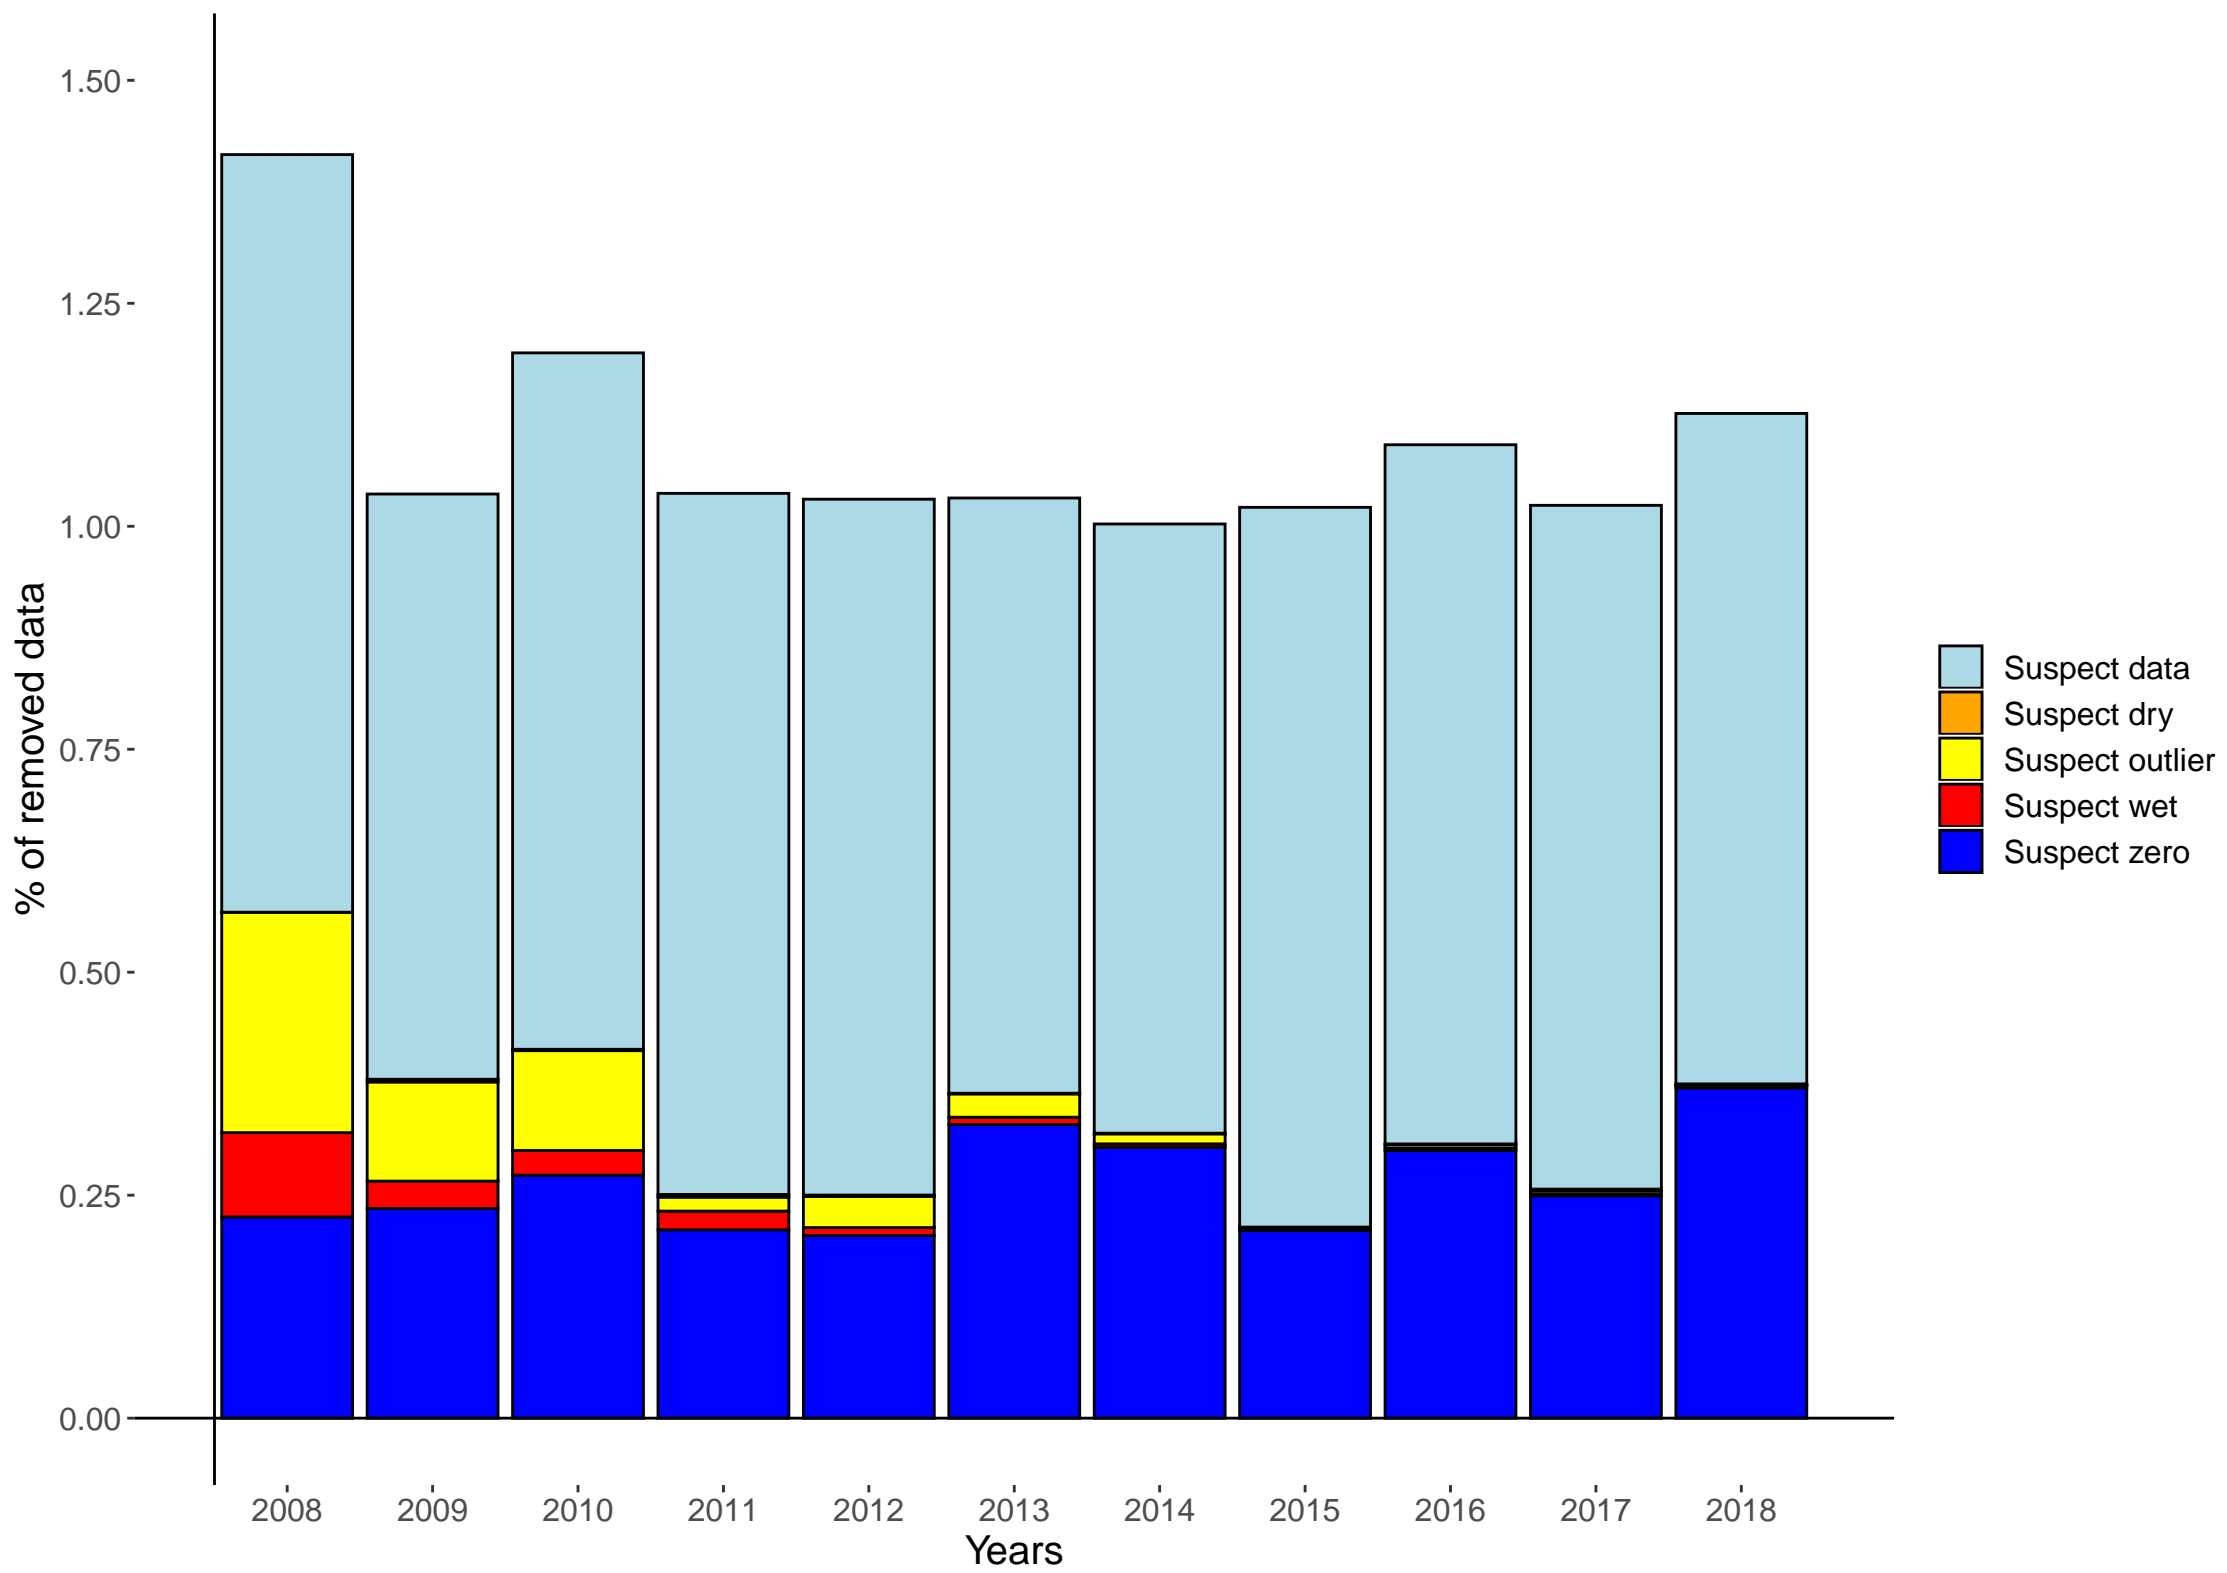

Supplement: s1 [file s1]

AEMET (mm/day)

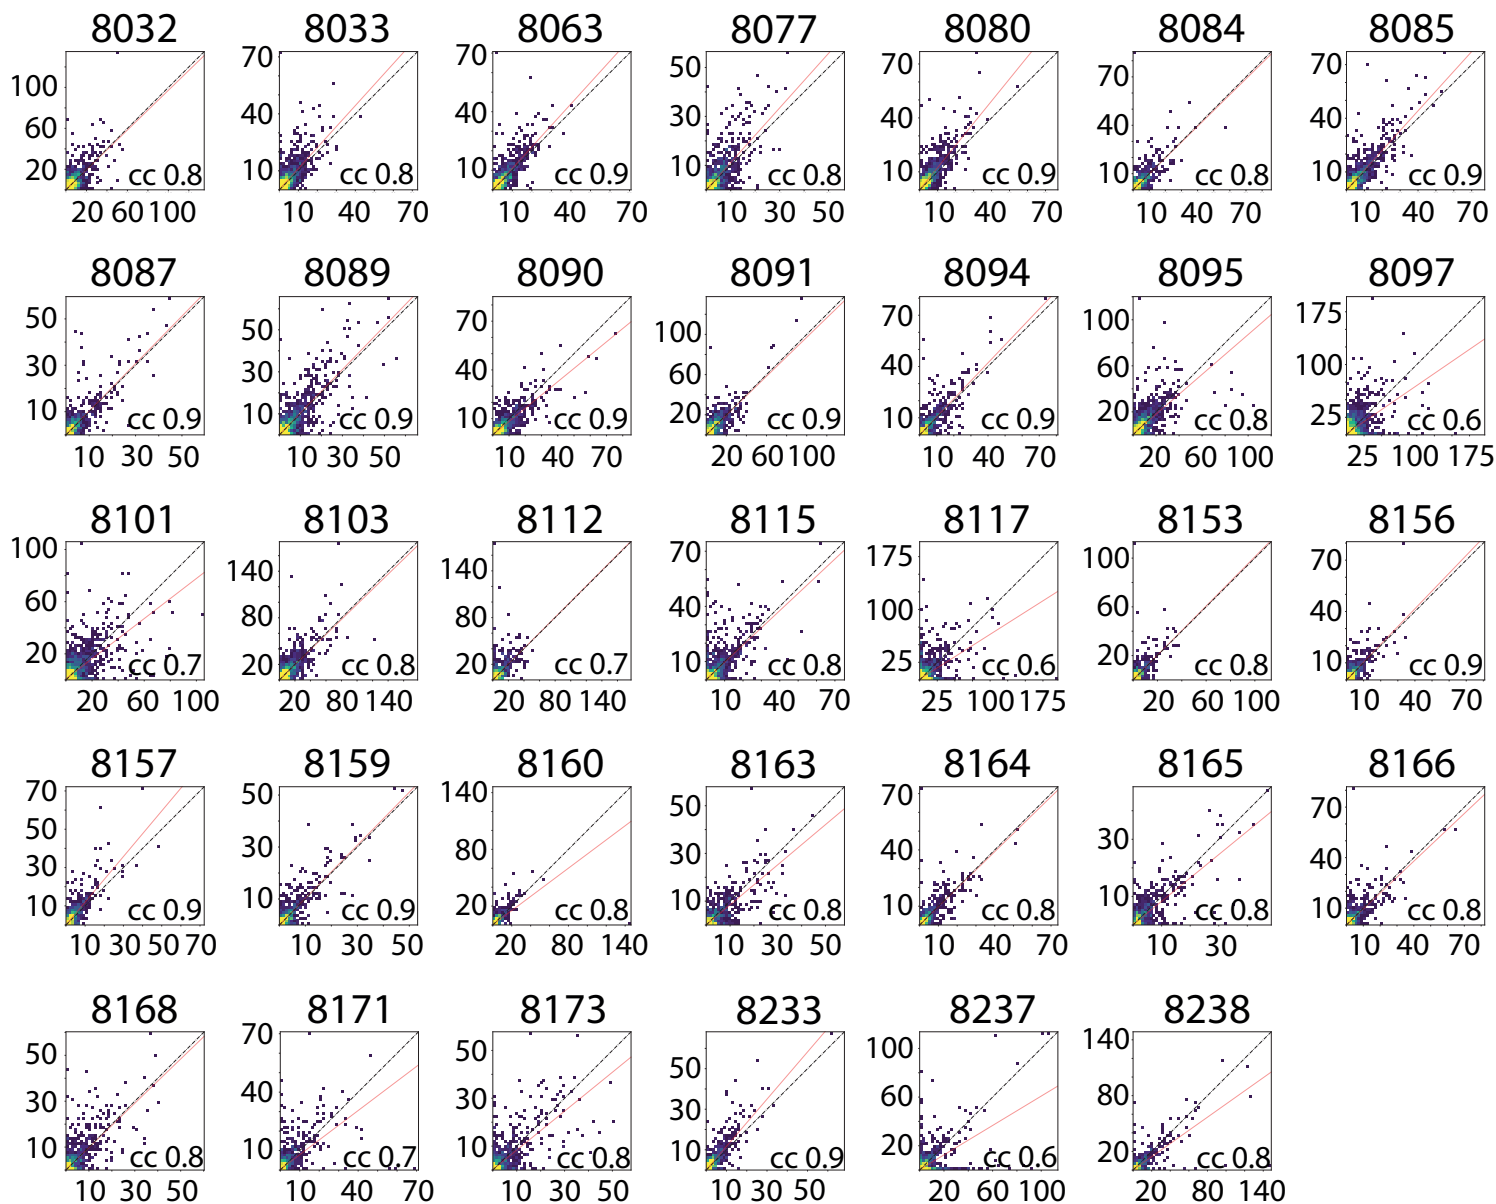

Counts/bin

GRID (mm/day)

Supplement: s1 [file s1]

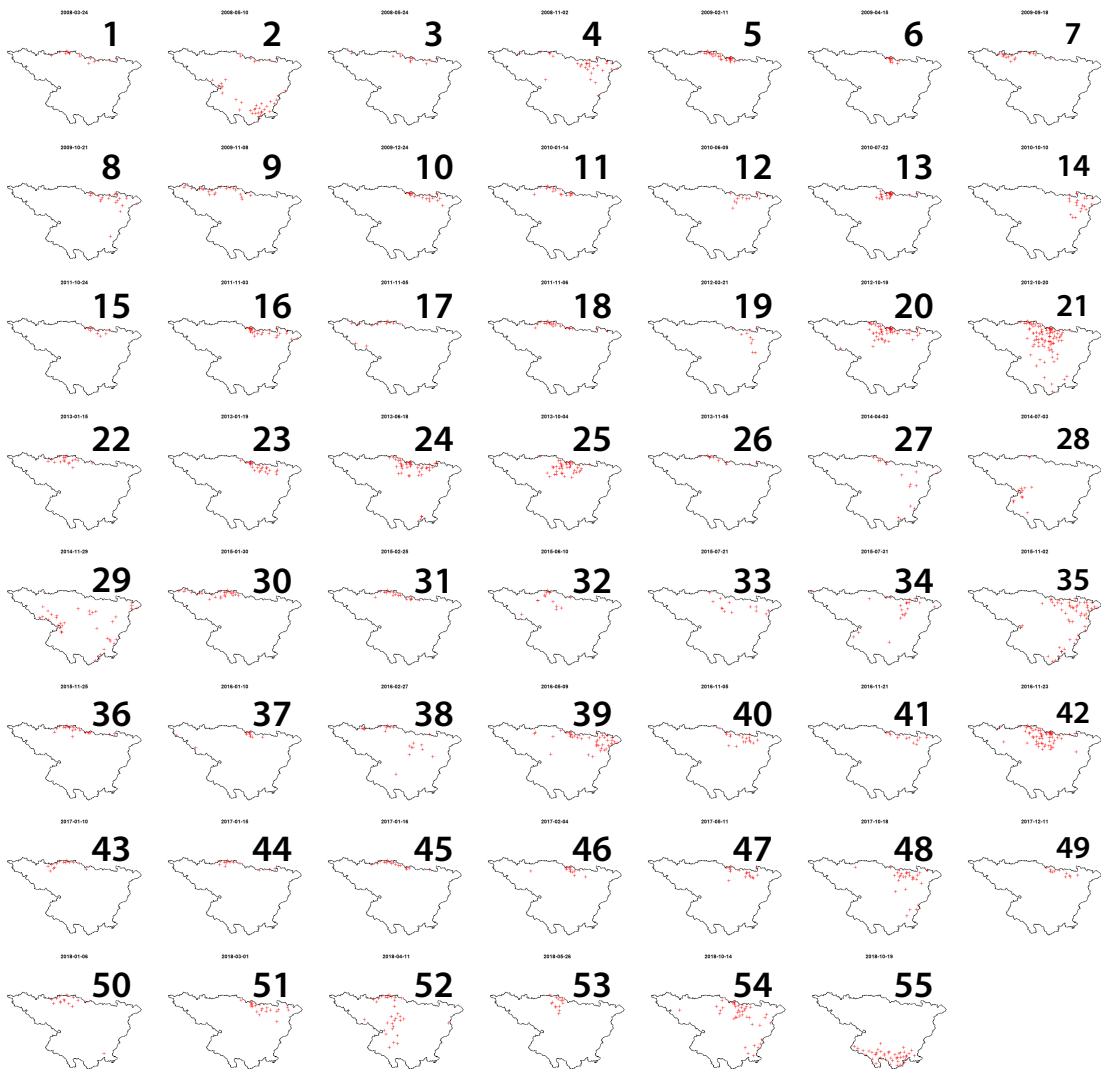

Supplement: s1 [file s1]

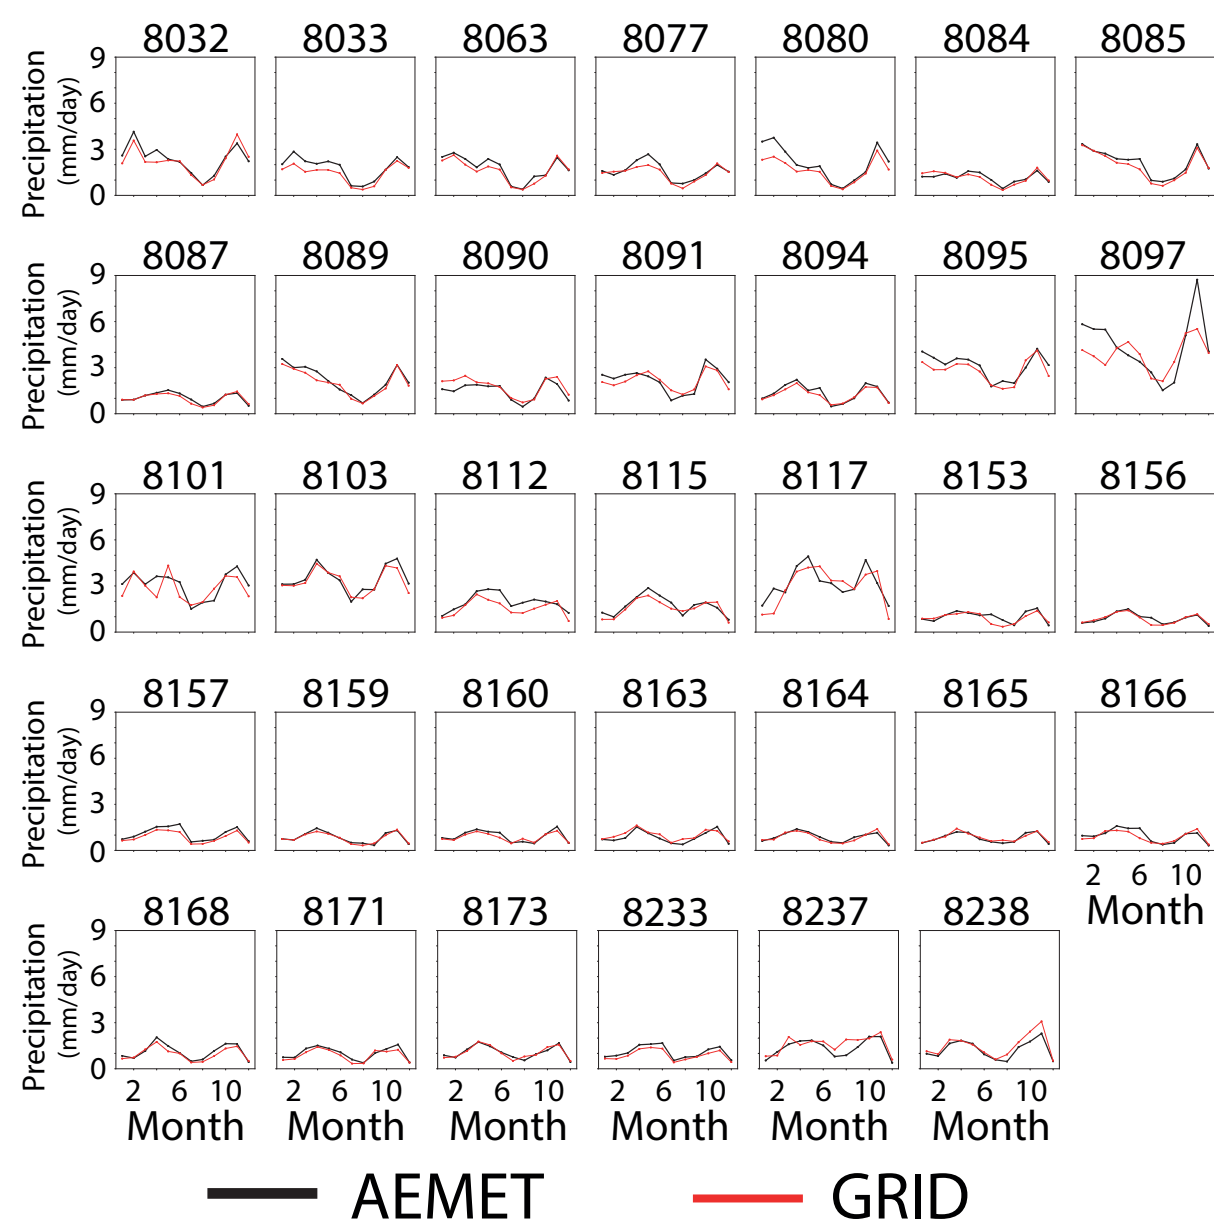

Supplement: s1 [file s1]

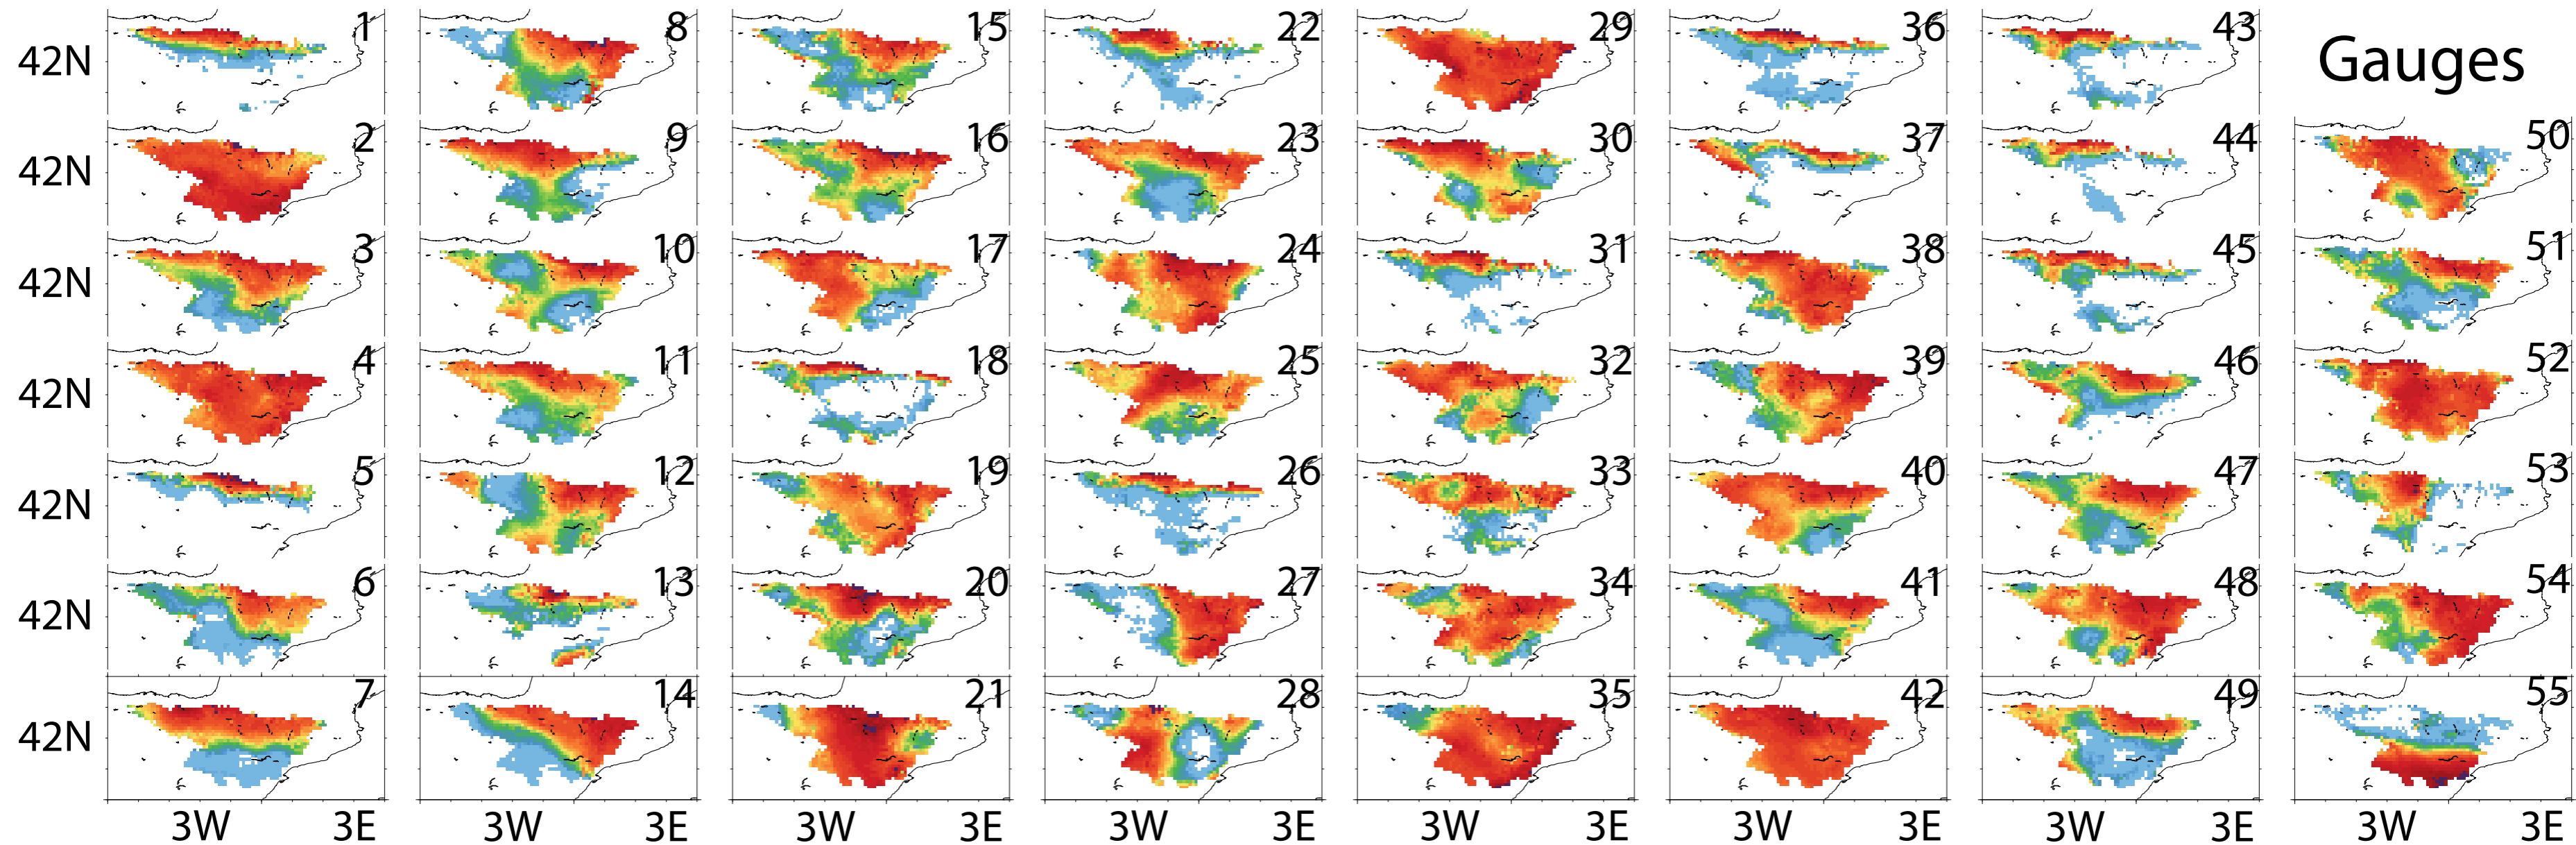

Precipitation (mm/day)

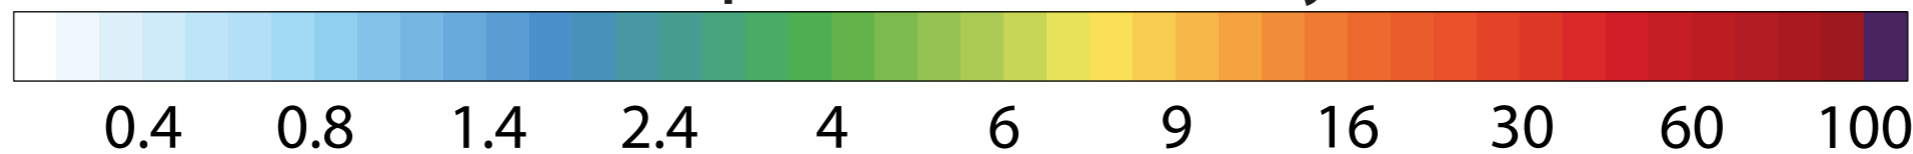

Supplement: s1 [file s1]

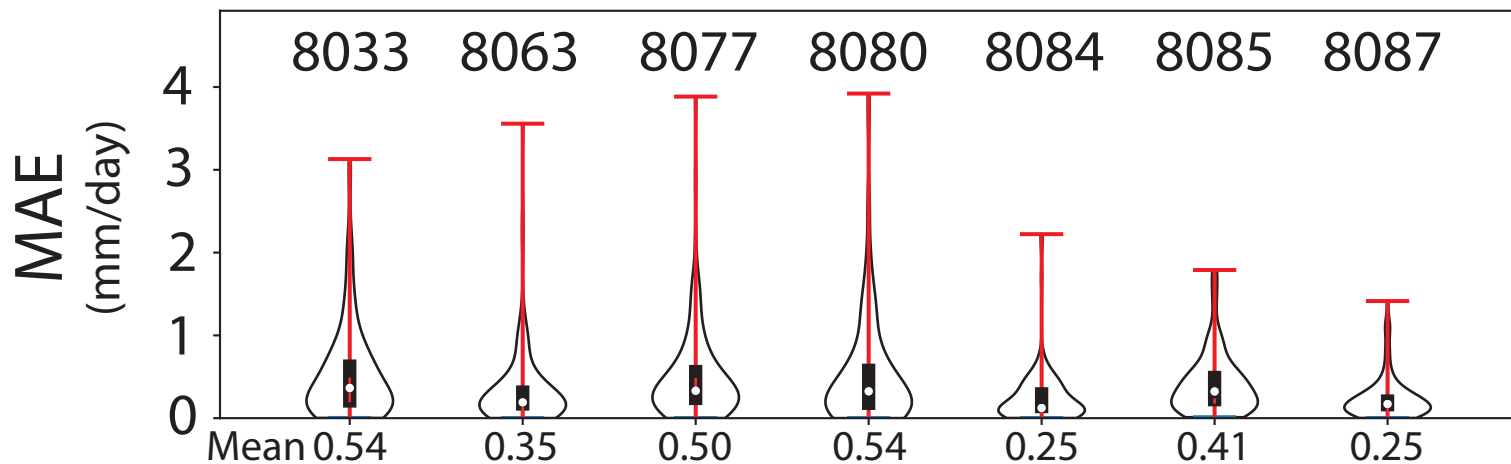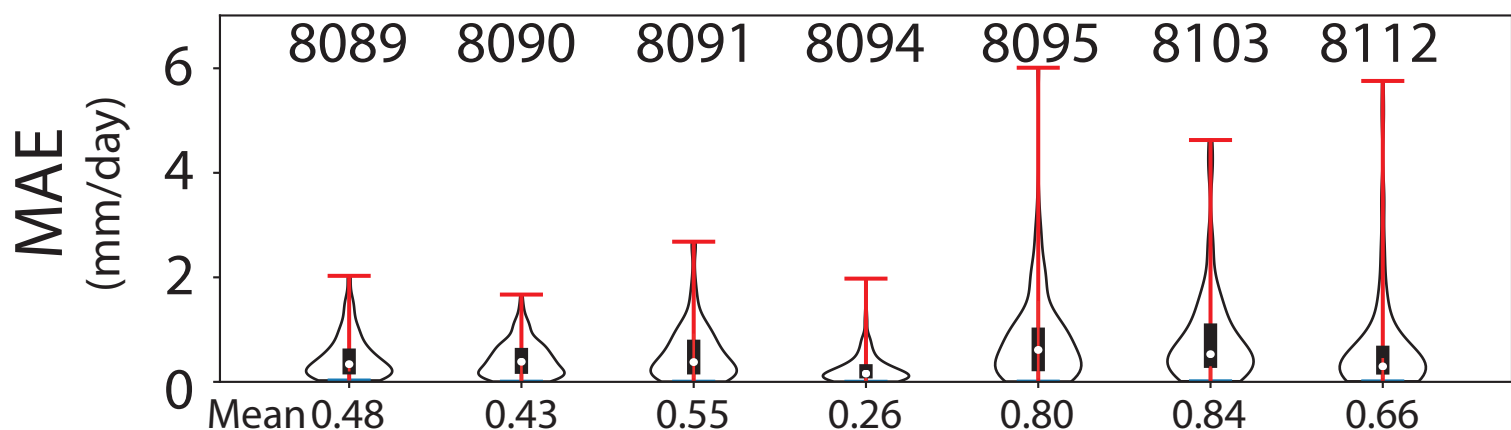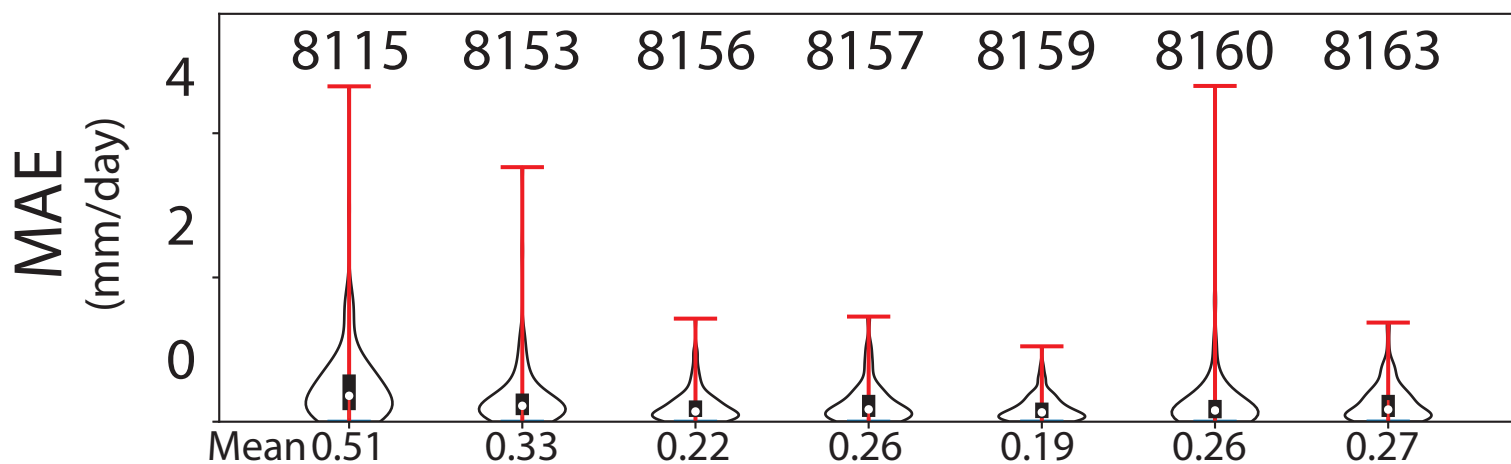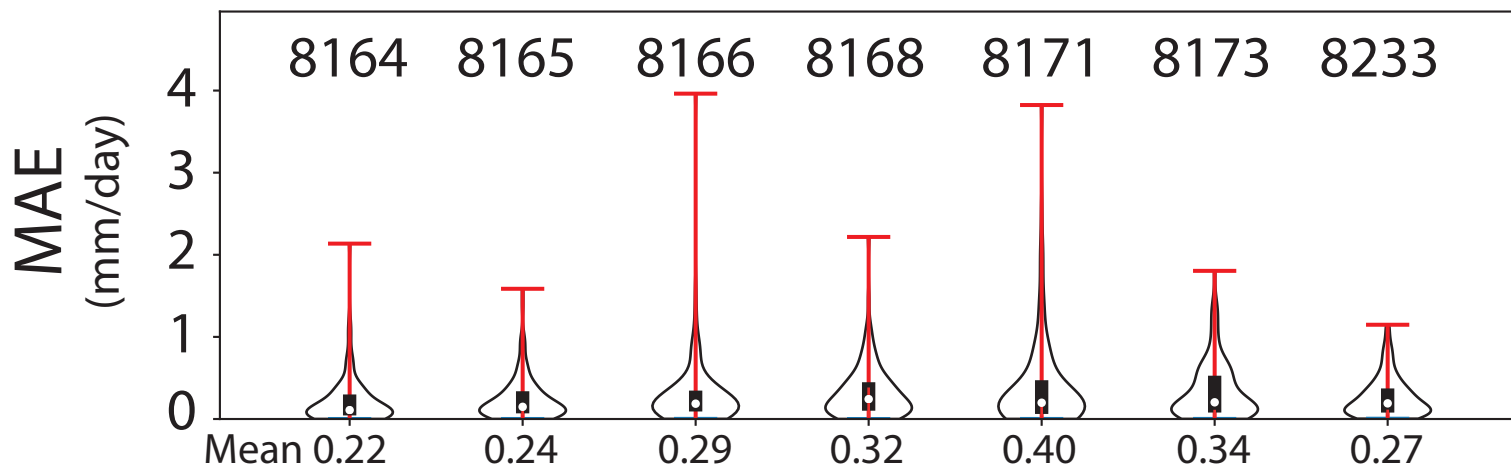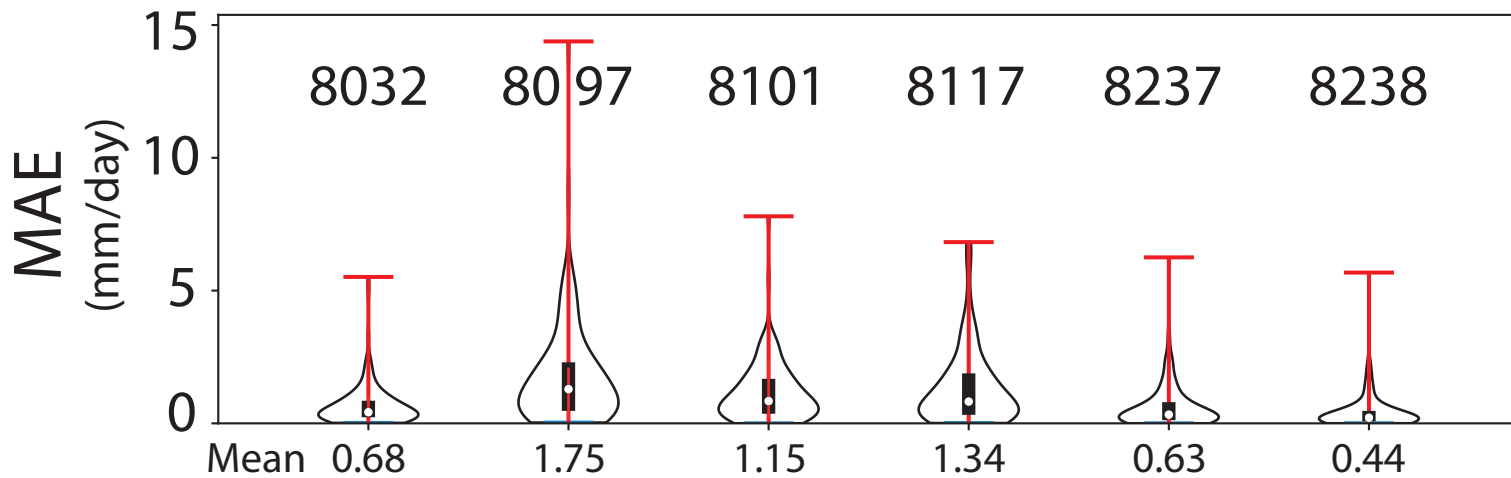

Supplement: s1 [file s1]

Density

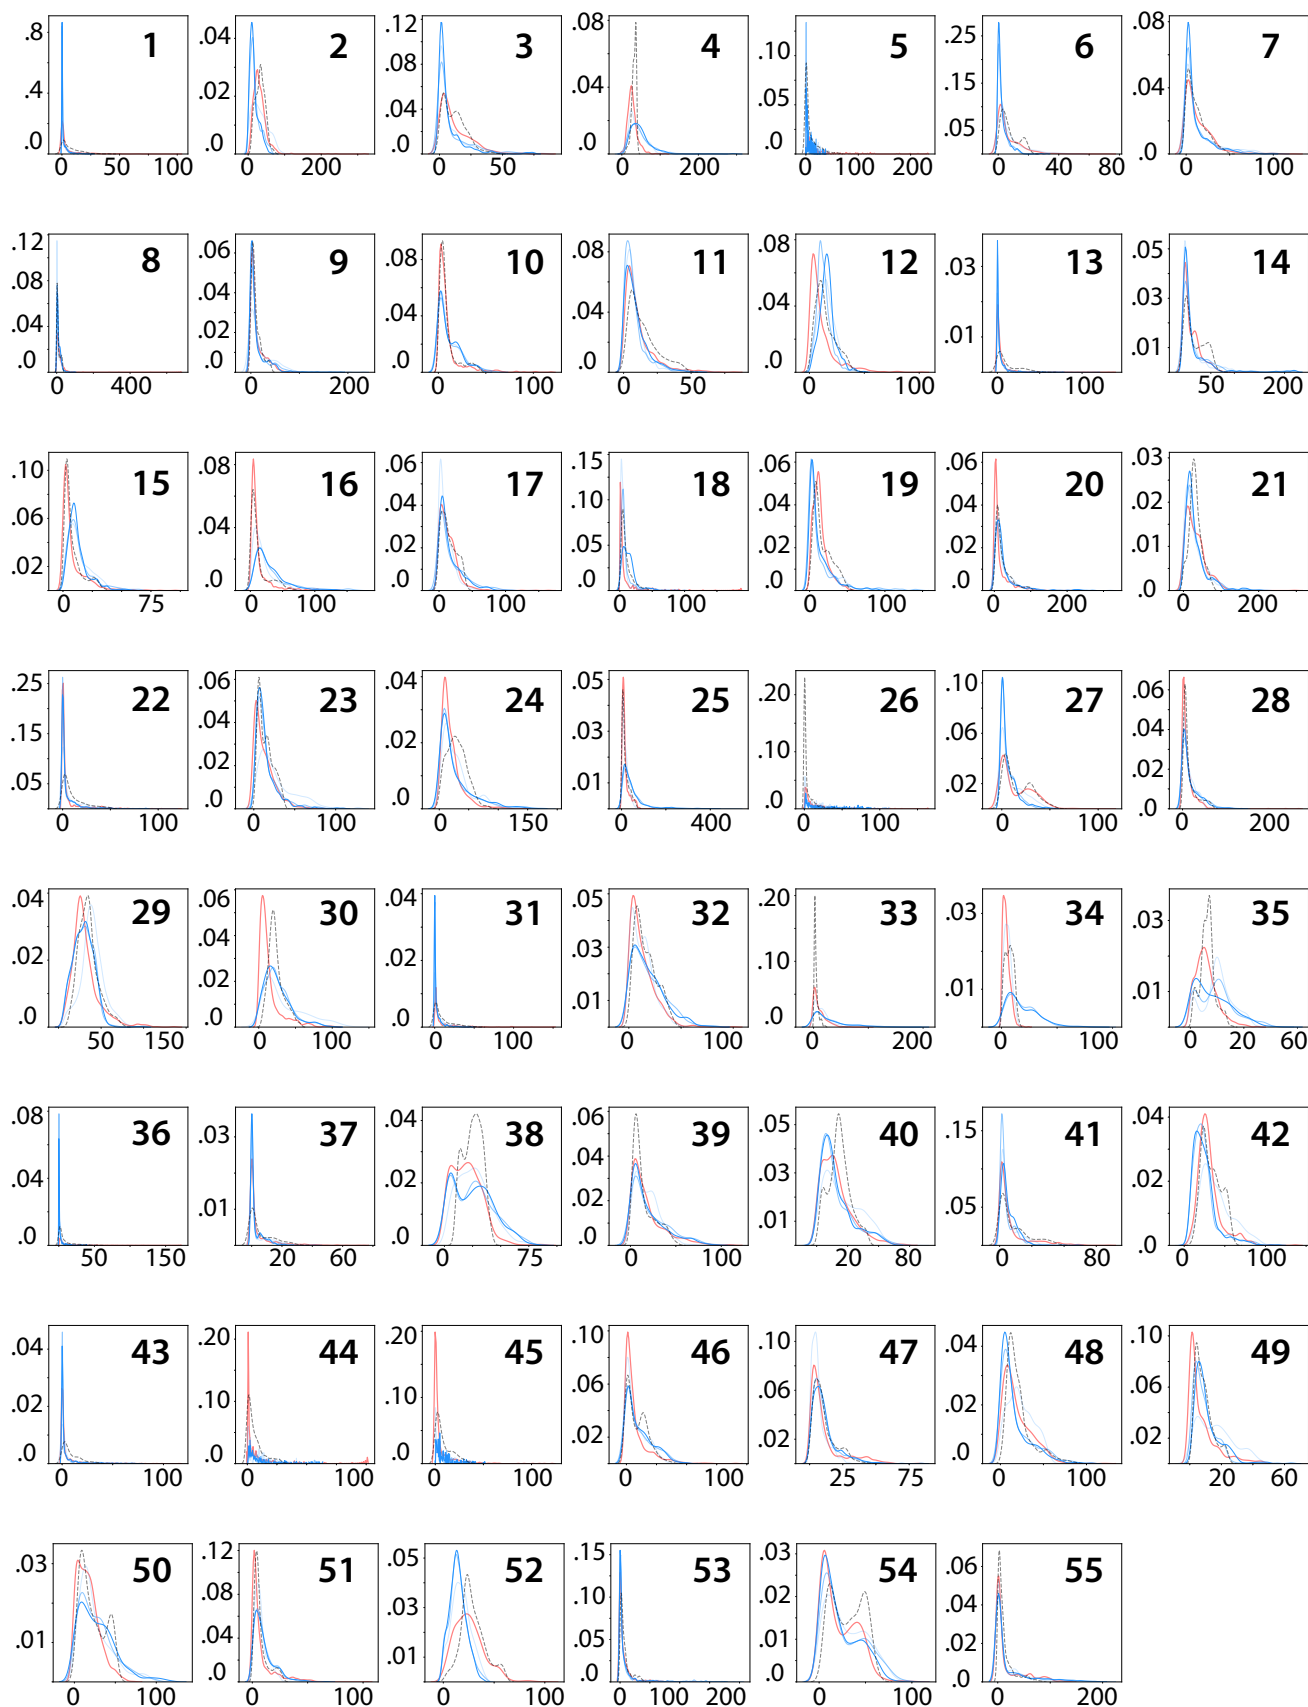

Precipitation (mm/day)

— Gauges — IMERG-E — IMERG-L — IMERG-F - - - ERA5-L

Supplement: s1 [file s1]
